# Supplementary material for: Feasibility, usability and acceptability of a novel digital hybrid-system for reporting of routine health information in Southern Tanzania: A mixed-methods study
Source: bioRxiv or medRxiv preprint supplement (doi:10.1101/2022.02.07.22270225), 2022-02-08
Supplement: Supplementary file [file media-1.pdf]

# REGISTRATION FORM

Health facility **DEMO**

Date  day -  month

01 1 02

Identification number **000-0092**

Name:  Partner name:   
 Age:  Height (cm):  Local government chairperson:   
 Village:  Street or/Sub-village:  Phone number:

**Pregnancy history**

**Current pregnancy**

Previous CS  Age of youngest child:

Duration of pregnancy (weeks):

**Number of:**

Miscarriages/Abortions:  Newborn deaths (first week):   
 Live births:  Stillbirths:  Children alive:

day month

Date of last menstrual period:  -   
 Estimated date of delivery:  -

Identification number **000-0101**

Name:  Partner name:   
 Age:  Height (cm):  Local government chairperson:   
 Village:  Street or/Sub-village:  Phone number:

**Pregnancy history**

**Current pregnancy**

Previous CS  Age of youngest child:

Duration of pregnancy (weeks):

**Number of:**

Miscarriages/Abortions:  Newborn deaths (first week):   
 Live births:  Stillbirths:  Children alive:

day month

Date of last menstrual period:  -   
 Estimated date of delivery:  -

01 1 02

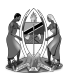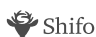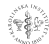

Karolinska Institutet

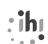

IFAKARA HEALTH INSTITUTE

# REGISTRATION FORM

01 2 02

Identification number

**000-0117**

Name:  Partner name:   
Age:  Height (cm):  Local government chairperson:   
Village:  Street or/Sub-village:  Phone number:

### Pregnancy history

Previous CS

Age of youngest child:

### Current pregnancy

Duration of pregnancy (weeks):

#### Number of:

Miscarriages/Abortions:

Newborn deaths (first week):

Live births:

Stillbirths:

Children alive:

Date of last menstrual period:  day -  month

Estimated date of delivery:  day -  month

Identification number

**000-0125**

Name:  Partner name:   
Age:  Height (cm):  Local government chairperson:   
Village:  Street or/Sub-village:  Phone number:

### Pregnancy history

Previous CS

Age of youngest child:

### Current pregnancy

Duration of pregnancy (weeks):

#### Number of:

Miscarriages/Abortions:

Newborn deaths (first week):

Live births:

Stillbirths:

Children alive:

Date of last menstrual period:  day -  month

Estimated date of delivery:  day -  month

01 2 02

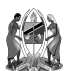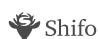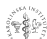

Karolinska Institutet

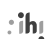

IFAKARA HEALTH INSTITUTE
